# Supplementary material for: Two glycosidases as label enzymes for concurrent enzyme-linked-immunosorbent-assay of two components via spectrophotometric-dual-enzyme-simultaneous-assay in one solution
Source: Royal Society of Chemistry journal article supplement (doi:10.1039/c3ay40615f), 2013-01-01
Supplement: c3ay40615f.pdf [file c3ay40615f.pdf]

Table S1. Effects of  $\lambda_1$  and  $\lambda_2$  on  $R_{12}$  and  $R_{21}$

| Mapada | $R_{12}$ | $\lambda_1$ and $\lambda_2$ (nm) |         |         |         | $R_{21}$ | $\lambda_1$ and $\lambda_2$ (nm) |         |         |         |
|--------|----------|----------------------------------|---------|---------|---------|----------|----------------------------------|---------|---------|---------|
|        | $R_{12}$ | 405/450                          | 405/460 | 400/450 | 400/460 |          | 405/450                          | 400/450 | 405/460 | 400/460 |
|        | Mean     | 0.0820                           | 0.0772  | 0.0053  | 0.0050  | mean     | 0.1867                           | 0.1840  | 0.0832  | 0.0820  |
|        | SD       | 0.0040                           | 0.0038  | 0.0027  | 0.0025  | SD       | 0.0049                           | 0.0049  | 0.0052  | 0.0052  |
| Biotek | $R_{12}$ | 405/450                          |         |         |         | $R_{21}$ | 450/405                          |         |         |         |
|        | mean     | 0.0818                           | nd      | nd      | nd      | mean     | 0.1917                           | nd      | nd      | nd      |
|        | SD       | 0.0019                           | nd      | nd      | nd      | SD       | 0.0022                           | nd      | nd      | nd      |

nd: no determination.

Table S2 Comparison of LOD, LOQ by SDESA versus those by separate assay on Biotek ELX800 microplate reader

| Conditions                    | $(n=7)$            | Wavelength | 450 nm |                | 405 nm |                |
|-------------------------------|--------------------|------------|--------|----------------|--------|----------------|
|                               |                    | Methods    | SDESA  | Separate assay | SDESA  | Separate assay |
| absorbance increase in 40 min | System Fluctuation | mean       | 0.003  | 0.003          | 0.002  | 0.001          |
|                               |                    | SD         | 0.002  | 0.002          | 0.001  | 0.001          |
|                               |                    | LOD        | 0.009  | 0.009          | 0.005  | 0.005          |
| absorbance increase in 40 min | BGAL:AGLU (1:1)    | STEYX      | 0.006  | 0.007          | 0.005  | 0.004          |
|                               |                    | LOQ        | 0.039  | 0.045          | 0.029  | 0.026          |
| absorbance increase in 40 min | BGAL:AGLU (1:3)    | STEYX      | 0.007  | 0.006          | nd     | nd             |
|                               |                    | LOQ        | 0.042  | 0.039          | nd     | nd             |
| absorbance increase in 40 min | BGAL:AGLU (1:27)   | STEYX      | 0.009  | 0.008          | nd     | nd             |
|                               |                    | LOQ        | 0.054  | 0.051          | nd     | nd             |
| absorbance increase in 40 min | BGAL:AGLU (3:1)    | STEYX      | nd     | nd             | 0.006  | 0.005          |
|                               |                    | LOQ        | nd     | nd             | 0.037  | 0.032          |
| absorbance increase in 40 min | BGAL:AGLU (27:1)   | STEYX      | nd     | nd             | 0.009  | 0.008          |
|                               |                    | LOQ        | nd     | nd             | 0.048  | 0.044          |

BGAL:  $\beta$ -D-galactosidase; AGLU:  $\alpha$ -D-glucosidase; STEYX: standard error of estimate; nd: no determination.

Table S3. LODs of two analytes by ELISA

| B/B <sub>0</sub> (%) (n=5) |              | mean  | SD  | mean-3*SD | LOD (ng/well) |
|----------------------------|--------------|-------|-----|-----------|---------------|
| SDESA                      | Penicillin G | 100.0 | 2.6 | 92.3      | 1.7           |
|                            | Clenbuterol  | 100.0 | 1.9 | 94.4      | 1.3           |
| Separate assay             | Penicillin G | 100.0 | 1.3 | 96.2      | 1.1           |
|                            | Clenbuterol  | 100.0 | 1.7 | 94.8      | 1.3           |

Table S4 Consistency of results by ELISA via SDESA with that via separate assay

| Sample NO. | Penicillin G (n=5)               |                                     |                       |                          |                 | Clenbuterol (n=5)                |                                     |                       |                          |                 |
|------------|----------------------------------|-------------------------------------|-----------------------|--------------------------|-----------------|----------------------------------|-------------------------------------|-----------------------|--------------------------|-----------------|
|            | SDESA-ELISA B/B <sub>0</sub> (%) | Separate assay B/B <sub>0</sub> (%) | SDESA-ELISA (ng/well) | Separate assay (ng/well) | consistency (%) | SDESA-ELISA B/B <sub>0</sub> (%) | Separate assay B/B <sub>0</sub> (%) | SDESA-ELISA (ng/well) | Separate assay (ng/well) | consistency (%) |
| mean       |                                  |                                     |                       |                          | 99              |                                  |                                     |                       |                          | 99              |
| SD         |                                  |                                     |                       |                          | 6               |                                  |                                     |                       |                          | 8               |
| 1          | 48.60                            | 46.00                               | 355                   | 391                      | 91              | 46.26                            | 49.13                               | 52                    | 56                       | 92              |
| 2          | 68.86                            | 67.73                               | 23                    | 24                       | 94              | 82.23                            | 79.26                               | nd                    | nd                       | nd              |
| 3          | 46.47                            | 44.56                               | 474                   | 469                      | 101             | 63.97                            | 66.33                               | 12                    | 13                       | 89              |
| 4          | 44.59                            | 41.92                               | 612                   | 657                      | 93              | 31.83                            | 35.11                               | 171                   | 183                      | 94              |
| 5          | 52.34                            | 51.17                               | 214                   | 202                      | 106             | 43.80                            | 46.66                               | 63                    | 69                       | 91              |
| 6          | 79.63                            | 79.73                               | nd                    | nd                       | nd              | 30.41                            | 34.79                               | 193                   | 188                      | 103             |
| 7          | 25.65                            | 20.90                               | nd                    | nd                       | nd              | 86.40                            | 88.74                               | nd                    | nd                       | nd              |
| 8          | 61.66                            | 61.06                               | 60                    | 57                       | 106             | 100.93                           | 98.77                               | nd                    | nd                       | nd              |
| 9          | 59.19                            | 56.78                               | 85                    | 99                       | 86              | 27.64                            | 32.20                               | 243                   | 234                      | 104             |
| 10         | 43.20                            | 41.71                               | 738                   | 676                      | 109             | 34.67                            | 37.44                               | 135                   | 151                      | 90              |
| 11         | 85.94                            | 86.14                               | nd                    | nd                       | nd              | 35.76                            | 39.80                               | 124                   | 124                      | 100             |
| 12         | 45.47                            | 43.08                               | 543                   | 567                      | 96              | 41.81                            | 46.50                               | 75                    | 70                       | 106             |
| 13         | 43.67                            | 40.94                               | 693                   | 745                      | 93              | 32.14                            | 35.42                               | 167                   | 179                      | 94              |
| 14         | 50.12                            | 48.96                               | 289                   | 268                      | 108             | 40.12                            | 43.96                               | 86                    | 87                       | 99              |
| 15         | 44.03                            | 42.12                               | 660                   | 641                      | 103             | 47.58                            | 52.29                               | 46                    | 43                       | 107             |
| 16         | 54.14                            | 52.29                               | 168                   | 175                      | 96              | 99.95                            | 104.18                              | nd                    | nd                       | nd              |
| 17         | 64.23                            | 63.67                               | 43                    | 41                       | 104             | 32.94                            | 37.56                               | 156                   | 149                      | 105             |
| 18         | 50.40                            | 49.01                               | 278                   | 266                      | 105             | 37.40                            | 41.99                               | 108                   | 103                      | 105             |
| 19         | 55.41                            | 53.60                               | 141                   | 148                      | 95              | 41.07                            | 43.10                               | 80                    | 94                       | 85              |
| 20         | 31.00                            | 31.05                               | nd                    | nd                       | nd              | 87.78                            | 93.15                               | nd                    | nd                       | nd              |
| 21         | 47.67                            | 45.56                               | 403                   | 413                      | 97              | 38.76                            | 43.96                               | 96                    | 87                       | 111             |
| 22         | 81.22                            | 82.16                               | nd                    | nd                       | nd              | 25.49                            | 29.69                               | nd                    | nd                       | nd              |
| 23         | 44.50                            | 42.35                               | 619                   | 622                      | 99              | 29.07                            | 32.90                               | 216                   | 221                      | 98              |
| 24         | 45.81                            | 43.49                               | 518                   | 538                      | 96              | 36.82                            | 41.95                               | 113                   | 103                      | 110             |
| 25         | 67.53                            | 67.32                               | 27                    | 26                       | 106             | 72.04                            | 76.11                               | 6                     | 6                        | 103             |
| 26         | 57.85                            | 55.97                               | 101                   | 109                      | 93              | 51.35                            | 54.41                               | 34                    | 36                       | 93              |
| 27         | 86.23                            | 80.04                               | nd                    | nd                       | nd              | 90.76                            | 82.66                               | nd                    | nd                       | nd              |

Only those data within quantifiable ranges were processed. nd: no determination. Samples with random unknown quantities of two analytes were used to test consistency of ELISA by separate assay and SDESA.

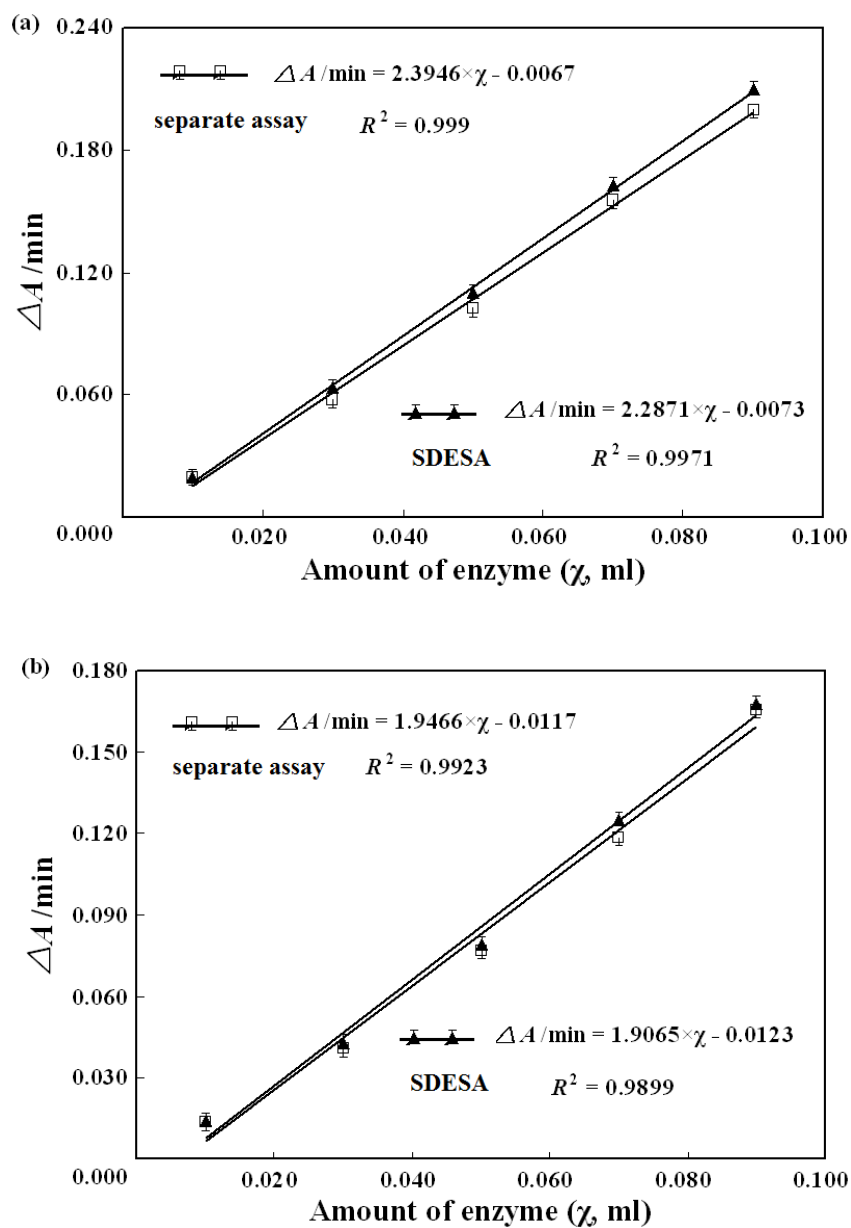

Figure S1 Response curves of  $\beta$ -D-galactosidase and  $\alpha$ -D-glucosidase by SDESA and separate assay

(a)  $\beta$ -D-galactosidase; (b)  $\alpha$ -D-glucosidase;
